# Supplementary material for: Improving calibration and validation of cosmic-ray neutron sensors in the light of spatial sensitivity
Source: Copernicus journal article supplement (doi:10.5194/hess-21-5009-2017), 2017-10-06
Supplement: Supplementary file 1 [file hess-21-5009-2017-supplement.zip]

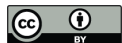

## *Supplement of*

# **Improving calibration and validation of cosmic-ray neutron sensors in the light of spatial sensitivity**

**Martin Schrön et al.**

*Correspondence to:* Martin Schrön ([martin.schroen@ufz.de](mailto:martin.schroen@ufz.de))

- [hess-21-5009-2017-supplement-title-page.pdf](#)
- [CRNS-calibration.xlsx](#)
- [CRNS-weighting.R](#)
- [CRNS-weighting.m](#)
- [CRNS-weighting.xlsx](#)

The copyright of individual parts of the supplement might differ from the CC BY 3.0 License.
