# Supplementary material for: Improving calibration and validation of cosmic-ray neutron sensors in the light of spatial sensitivity
Source: Copernicus journal article supplement (doi:10.5194/hess-21-5009-2017), 2017-10-06
Supplement: Supplementary file 2 [file hess-21-5009-2017-supplement.zip]

Archive with 5 entries (5 files):
- hess-21-5009-2017-supplement-title-page.pdf
- CRNS-weighting.m
- CRNS-weighting.xlsx
- CRNS-calibration.xlsx
- CRNS-weighting.R
