# Supplementary material for: Improving calibration and validation of cosmic-ray neutron sensors in the light of spatial sensitivity
Source: Copernicus journal article supplement (doi:10.5194/hess-21-5009-2017), 2017-10-06
Supplement: Supplementary file 2 [file hess-21-5009-2017-supplement.zip › CRNS-calibration.xlsx]

## Sheet: Conditions & Horizontal Wt.
CRNS Calibration					Average Environmental Conditions
					p=	1013.25	mbar, air pressure					1.00016	footprint scaling
					Hveg=	0	m, tested for vegetation heights up to 2m					1	footprint scaling
					bd=	1.1	g/cm3, bulk density of the soil					0.909091	depth scaling
					h=	10	g/m3, air humidity tested from 0.1 to 50
Radial weighting function for horizontal averaging					SM=	0.02	m3/m3, soil moisture, tested from 0.02 to 0.50
in accordance to Schrön et al. (2017, HESS)
Distance r [m]	Horiz. weight	...normalized			a00	8735	a01	22.689	a02	11720	a03	0.00978	a04	9306	a05	0.003632
0	0	0			a10	0.027925	a11	6.6577	a12	0.028544	a13	0.002455	a14	6.851e-05	a15	12.2755
0.1	158189	0.00545624			a20	247970	a21	23.289	a22	374655	a23	0.00191	a24	258552
0.2	250567	0.00864254			a30	0.054818	a31	21.032	a32	0.6373	a33	0.0791	a34	0.0005425
0.3	301037	0.0103833
0.4	325010	0.0112102			A0	18050.9	A1	0.0041658	A2	528094	A3	0.677138
0.5	332412	0.0114655
0.6	329625	0.0113694		formulas	A0 = (a00*(1+a03*x)*exp(-a01*y)+a02*(1+a05*x)-a04*y)
0.7	320742	0.011063			A1 = ((-a10+a14*x)*exp(-a11*y/(1+a15*y))+a12)*(1+x*a13)
0.8	308376	0.0106365			A2 = (a20*(1+a23*x)*exp(-a21*y)+a22-a24*y)
0.9	294190	0.0101472			A3 = a30*exp(-a31*y)+a32-a33*y+a34*x
1	279230	0.00963119
1.1	268740	0.00926935			WrA = A0*(exp(-A1*r))+A2*exp(-A3*r)					radial weighting function for 1 ≤ r ≤ 50 m
1.2	252316	0.00870287			Distance r is additionally scaled with air pressure and vegetation height (testing phase under current research)
1.3	236968	0.00817346
1.4	222623	0.00767869			b00	39006	b01	15002337	b02	2009.24	b03	0.01181	b04	3.146	b05	16.7417	b06	3727
1.5	209217	0.00721629			b10	6.031e-05	b11	98.5	b12	0.0013826
1.6	196688	0.00678415			b20	11747	b21	55.033	b22	4521	b23	0.01998	b24	0.00604	b25	33474	b26	0.00475
1.7	184979	0.00638027			b30	0.01543	b31	13.29	b32	0.01807	b33	0.0011	b34	8.81e-05	b35	0.0405	b36	26.74
1.8	174036	0.00600282
1.9	163808	0.00565006			B0	5728.68	B1	0.00657129	B2	17223.1	B3	0.0108273
2	154250	0.00532037
2.1	145317	0.00501225		formulas	B0 = (b00-b01/(b02*y+x-0.13))*(b03-y)*exp(-b04*y)-b05*x*y+b06
2.2	136968	0.00472429			B1 = b10*(x+b11)+b12*y
2.3	129165	0.00445516			B2 = (b20*(1-b26*x)*exp(-b21*y*(1-x*b24))+b22-b25*y)*(2+x*b23)
2.4	121873	0.00420362			B3 = ((-b30+b34*x)*exp(-b31*y/(1+b35*x+b36*y))+b32)*(2+x*b33)
2.5	115057	0.00396854
2.6	108687	0.00374883			WrB = B0*(exp(-B1*r))+B2*exp(-B3*r)					radial weighting function for 50.1 ≤ r ≤ 350 m
2.7	102734	0.00354349			Distance r is additionally scaled with air pressure and vegetation height (testing phase under current research)
2.8	97169.8	0.00335157
2.9	91969.4	0.0031722
3	87108.9	0.00300455
3.1	82566.2	0.00284786
3.2	78320.3	0.00270142
3.3	74351.9	0.00256454
3.4	70642.8	0.0024366
3.5	67176	0.00231703
3.6	63935.6	0.00220526
3.7	60906.9	0.0021008
3.8	58076	0.00200315
3.9	55430	0.00191188
4	52956.6	0.00182657
4.1	50644.7	0.00174683
4.2	48483.7	0.00167229
4.3	46463.6	0.00160262
4.4	44575.3	0.00153749
4.5	42810.1	0.0014766
4.6	41160	0.00141969
4.7	39617.4	0.00136648
4.8	38175.4	0.00131674
4.9	36827.2	0.00127024
5	35566.9	0.00122677
5.1	34388.5	0.00118612
5.2	33286.8	0.00114813
5.3	32256.8	0.0011126
5.4	31293.7	0.00107938
5.5	30393.2	0.00104832
5.6	29551.1	0.00101927
5.7	28763.7	0.000992114
5.8	28027.3	0.000966716
5.9	27338.7	0.000942964
6	26694.7	0.000920751
6.1	26092.4	0.000899975
6.2	25529	0.000880543
6.3	25002	0.000862366
6.4	24509	0.000845363
6.5	24047.9	0.000829457
6.6	23616.4	0.000814575
6.7	23212.7	0.000800651
6.8	22835	0.000787623
6.9	22481.5	0.00077543
7	22150.7	0.00076402
7.1	21841.1	0.00075334
7.2	21551.2	0.000743342
7.3	21279.9	0.000733983
7.4	21025.8	0.00072522
7.5	20787.9	0.000717015
7.6	20565.1	0.00070933
7.7	20356.4	0.000702132
7.8	20160.9	0.000695389
7.9	19977.8	0.000689071
8	19806.1	0.00068315
8.1	19645.2	0.0006776
8.2	19494.4	0.000672398
8.3	19352.9	0.000667519
8.4	19220.3	0.000662944
8.5	19095.8	0.000658652
8.6	18979.1	0.000654625
8.7	18869.5	0.000650844
8.8	18766.6	0.000647296
8.9	18670	0.000643963
9	18579.2	0.000640832
9.1	18493.9	0.00063789
9.2	18413.7	0.000635124
9.3	18338.3	0.000632523
9.4	18267.4	0.000630076
9.5	18200.6	0.000627773
9.6	18137.7	0.000625604
9.7	18078.5	0.000623562
9.8	18022.7	0.000621637
9.9	17970.1	0.000619821
10	17920.4	0.000618108
10.1	17873.5	0.000616492
10.2	17829.2	0.000614964
10.3	17787.4	0.000613521
10.4	17747.8	0.000612156
10.5	17710.4	0.000610864
10.6	17674.9	0.000609641
10.7	17641.3	0.000608481
10.8	17609.4	0.000607382
10.9	17579.1	0.000606338
11	17550.4	0.000605346
11.1	17523.1	0.000604403
11.2	17497	0.000603506
11.3	17472.3	0.000602652
11.4	17448.6	0.000601837
11.5	17426.1	0.000601059
11.6	17404.6	0.000600317
11.7	17384	0.000599607
11.8	17364.3	0.000598927
11.9	17345.4	0.000598276
12	17327.3	0.000597651
12.1	17309.9	0.000597051
12.2	17293.2	0.000596474
12.3	17277.1	0.00059592
12.4	17261.6	0.000595385
12.5	17246.6	0.000594869
12.6	17232.2	0.000594371
12.7	17218.2	0.00059389
12.8	17204.7	0.000593424
12.9	17191.7	0.000592973
13	17179	0.000592535
13.1	17166.6	0.00059211
13.2	17154.7	0.000591697
13.3	17143	0.000591295
13.4	17131.6	0.000590903
13.5	17120.6	0.000590521
13.6	17109.7	0.000590148
13.7	17099.2	0.000589783
13.8	17088.8	0.000589426
13.9	17078.7	0.000589077
14	17068.8	0.000588735
14.1	17059.1	0.000588399
14.2	17049.5	0.000588069
14.3	17040.1	0.000587745
14.4	17030.9	0.000587427
14.5	17021.8	0.000587113
14.6	17012.8	0.000586804
14.7	17004	0.000586499
14.8	16995.3	0.000586199
14.9	16986.6	0.000585902
15	16978.1	0.000585608
15.1	16969.7	0.000585319
15.2	16961.4	0.000585032
15.3	16953.2	0.000584748
15.4	16945	0.000584467
15.5	16937	0.000584188
15.6	16929	0.000583912
15.7	16921	0.000583638
15.8	16913.2	0.000583367
15.9	16905.3	0.000583097
16	16897.6	0.000582829
16.1	16889.9	0.000582563
16.2	16882.2	0.000582299
16.3	16874.6	0.000582036
16.4	16867	0.000581774
16.5	16859.4	0.000581514
16.6	16851.9	0.000581255
16.7	16844.5	0.000580998
16.8	16837	0.000580741
16.9	16829.6	0.000580486
17	16822.2	0.000580231
17.1	16814.9	0.000579978
17.2	16807.6	0.000579725
17.3	16800.3	0.000579473
17.4	16793	0.000579222
17.5	16785.7	0.000578972
17.6	16778.5	0.000578722
17.7	16771.3	0.000578473
17.8	16764.1	0.000578225
17.9	16756.9	0.000577977
18	16749.7	0.00057773
18.1	16742.6	0.000577484
18.2	16735.5	0.000577238
18.3	16728.3	0.000576992
18.4	16721.2	0.000576747
18.5	16714.1	0.000576502
18.6	16707	0.000576258
18.7	16700	0.000576014
18.8	16692.9	0.00057577
18.9	16685.9	0.000575527
19	16678.8	0.000575284
19.1	16671.8	0.000575041
19.2	16664.7	0.000574799
19.3	16657.7	0.000574557
19.4	16650.7	0.000574315
19.5	16643.7	0.000574073
19.6	16636.7	0.000573832
19.7	16629.7	0.000573591
19.8	16622.8	0.00057335
19.9	16615.8	0.00057311
20	16608.8	0.00057287
20.1	16601.9	0.000572629
20.2	16594.9	0.00057239
20.3	16587.9	0.00057215
20.4	16581	0.00057191
20.5	16574.1	0.000571671
20.6	16567.1	0.000571432
20.7	16560.2	0.000571193
20.8	16553.3	0.000570954
20.9	16546.4	0.000570715
21	16539.4	0.000570477
21.1	16532.5	0.000570238
21.2	16525.6	0.00057
21.3	16518.7	0.000569762
21.4	16511.8	0.000569524
21.5	16504.9	0.000569286
21.6	16498	0.000569049
21.7	16491.2	0.000568811
21.8	16484.3	0.000568574
21.9	16477.4	0.000568337
22	16470.5	0.0005681
22.1	16463.7	0.000567863
22.2	16456.8	0.000567626
22.3	16449.9	0.000567389
22.4	16443.1	0.000567152
22.5	16436.2	0.000566916
22.6	16429.4	0.00056668
22.7	16422.5	0.000566443
22.8	16415.7	0.000566207
22.9	16408.8	0.000565971
23	16402	0.000565735
23.1	16395.1	0.0005655
23.2	16388.3	0.000565264
23.3	16381.5	0.000565028
23.4	16374.7	0.000564793
23.5	16367.8	0.000564557
23.6	16361	0.000564322
23.7	16354.2	0.000564087
23.8	16347.4	0.000563852
23.9	16340.6	0.000563617
24	16333.8	0.000563382
24.1	16327	0.000563148
24.2	16320.2	0.000562913
24.3	16313.4	0.000562679
24.4	16306.6	0.000562444
24.5	16299.8	0.00056221
24.6	16293	0.000561976
24.7	16286.2	0.000561742
24.8	16279.4	0.000561508
24.9	16272.6	0.000561274
25	16265.8	0.00056104
25.1	16259.1	0.000560806
25.2	16252.3	0.000560573
25.3	16245.5	0.000560339
25.4	16238.8	0.000560106
25.5	16232	0.000559872
25.6	16225.2	0.000559639
25.7	16218.5	0.000559406
25.8	16211.7	0.000559173
25.9	16205	0.00055894
26	16198.2	0.000558708
26.1	16191.5	0.000558475
26.2	16184.7	0.000558242
26.3	16178	0.00055801
26.4	16171.3	0.000557777
26.5	16164.5	0.000557545
26.6	16157.8	0.000557313
26.7	16151.1	0.000557081
26.8	16144.3	0.000556849
26.9	16137.6	0.000556617
27	16130.9	0.000556385
27.1	16124.2	0.000556153
27.2	16117.5	0.000555922
27.3	16110.7	0.00055569
27.4	16104	0.000555459
27.5	16097.3	0.000555228
27.6	16090.6	0.000554996
27.7	16083.9	0.000554765
27.8	16077.2	0.000554534
27.9	16070.5	0.000554303
28	16063.8	0.000554072
28.1	16057.2	0.000553842
28.2	16050.5	0.000553611
28.3	16043.8	0.00055338
28.4	16037.1	0.00055315
28.5	16030.4	0.00055292
28.6	16023.7	0.000552689
28.7	16017.1	0.000552459
28.8	16010.4	0.000552229
28.9	16003.7	0.000551999
29	15997.1	0.000551769
29.1	15990.4	0.00055154
29.2	15983.8	0.00055131
29.3	15977.1	0.00055108
29.4	15970.4	0.000550851
29.5	15963.8	0.000550621
29.6	15957.1	0.000550392
29.7	15950.5	0.000550163
29.8	15943.9	0.000549934
29.9	15937.2	0.000549705
30	15930.6	0.000549476
30.1	15923.9	0.000549247
30.2	15917.3	0.000549018
30.3	15910.7	0.00054879
30.4	15904.1	0.000548561
30.5	15897.4	0.000548333
30.6	15890.8	0.000548104
30.7	15884.2	0.000547876
30.8	15877.6	0.000547648
30.9	15871	0.00054742
31	15864.4	0.000547192
31.1	15857.8	0.000546964
31.2	15851.2	0.000546736
31.3	15844.6	0.000546509
31.4	15838	0.000546281
31.5	15831.4	0.000546054
31.6	15824.8	0.000545826
31.7	15818.2	0.000545599
31.8	15811.6	0.000545372
31.9	15805	0.000545145
32	15798.4	0.000544918
32.1	15791.8	0.000544691
32.2	15785.3	0.000544464
32.3	15778.7	0.000544237
32.4	15772.1	0.000544011
32.5	15765.6	0.000543784
32.6	15759	0.000543558
32.7	15752.4	0.000543331
32.8	15745.9	0.000543105
32.9	15739.3	0.000542879
33	15732.8	0.000542653
33.1	15726.2	0.000542427
33.2	15719.7	0.000542201
33.3	15713.1	0.000541975
33.4	15706.6	0.000541749
33.5	15700	0.000541524
33.6	15693.5	0.000541298
33.7	15687	0.000541073
33.8	15680.4	0.000540848
33.9	15673.9	0.000540622
34	15667.4	0.000540397
34.1	15660.8	0.000540172
34.2	15654.3	0.000539947
34.3	15647.8	0.000539722
34.4	15641.3	0.000539498
34.5	15634.8	0.000539273
34.6	15628.3	0.000539048
34.7	15621.8	0.000538824
34.8	15615.2	0.0005386
34.9	15608.7	0.000538375
35	15602.2	0.000538151
35.1	15595.7	0.000537927
35.2	15589.3	0.000537703
35.3	15582.8	0.000537479
35.4	15576.3	0.000537255
35.5	15569.8	0.000537031
35.6	15563.3	0.000536808
35.7	15556.8	0.000536584
35.8	15550.3	0.000536361
35.9	15543.9	0.000536137
36	15537.4	0.000535914
36.1	15530.9	0.000535691
36.2	15524.5	0.000535468
36.3	15518	0.000535245
36.4	15511.5	0.000535022
36.5	15505.1	0.000534799
36.6	15498.6	0.000534577
36.7	15492.2	0.000534354
36.8	15485.7	0.000534131
36.9	15479.3	0.000533909
37	15472.8	0.000533687
37.1	15466.4	0.000533464
37.2	15459.9	0.000533242
37.3	15453.5	0.00053302
37.4	15447.1	0.000532798
37.5	15440.6	0.000532576
37.6	15434.2	0.000532355
37.7	15427.8	0.000532133
37.8	15421.3	0.000531911
37.9	15414.9	0.00053169
38	15408.5	0.000531468
38.1	15402.1	0.000531247
38.2	15395.7	0.000531026
38.3	15389.3	0.000530805
38.4	15382.9	0.000530584
38.5	15376.4	0.000530363
38.6	15370	0.000530142
38.7	15363.6	0.000529921
38.8	15357.2	0.000529701
38.9	15350.9	0.00052948
39	15344.5	0.000529259
39.1	15338.1	0.000529039
39.2	15331.7	0.000528819
39.3	15325.3	0.000528599
39.4	15318.9	0.000528378
39.5	15312.5	0.000528158
39.6	15306.2	0.000527938
39.7	15299.8	0.000527719
39.8	15293.4	0.000527499
39.9	15287	0.000527279
40	15280.7	0.00052706
40.1	15274.3	0.00052684
40.2	15268	0.000526621
40.3	15261.6	0.000526401
40.4	15255.2	0.000526182
40.5	15248.9	0.000525963
40.6	15242.5	0.000525744
40.7	15236.2	0.000525525
40.8	15229.8	0.000525306
40.9	15223.5	0.000525088
41	15217.2	0.000524869
41.1	15210.8	0.00052465
41.2	15204.5	0.000524432
41.3	15198.2	0.000524213
41.4	15191.8	0.000523995
41.5	15185.5	0.000523777
41.6	15179.2	0.000523559
41.7	15172.9	0.000523341
41.8	15166.5	0.000523123
41.9	15160.2	0.000522905
42	15153.9	0.000522687
42.1	15147.6	0.00052247
42.2	15141.3	0.000522252
42.3	15135	0.000522035
42.4	15128.7	0.000521817
42.5	15122.4	0.0005216
42.6	15116.1	0.000521383
42.7	15109.8	0.000521166
42.8	15103.5	0.000520949
42.9	15097.2	0.000520732
43	15090.9	0.000520515
43.1	15084.6	0.000520298
43.2	15078.4	0.000520081
43.3	15072.1	0.000519865
43.4	15065.8	0.000519648
43.5	15059.5	0.000519432
43.6	15053.3	0.000519216
43.7	15047	0.000518999
43.8	15040.7	0.000518783
43.9	15034.5	0.000518567
44	15028.2	0.000518351
44.1	15021.9	0.000518135
44.2	15015.7	0.00051792
44.3	15009.4	0.000517704
44.4	15003.2	0.000517488
44.5	14996.9	0.000517273
44.6	14990.7	0.000517057
44.7	14984.5	0.000516842
44.8	14978.2	0.000516627
44.9	14972	0.000516412
45	14965.7	0.000516197
45.1	14959.5	0.000515982
45.2	14953.3	0.000515767
45.3	14947.1	0.000515552
45.4	14940.8	0.000515337
45.5	14934.6	0.000515123
45.6	14928.4	0.000514908
45.7	14922.2	0.000514694
45.8	14916	0.00051448
45.9	14909.7	0.000514265
46	14903.5	0.000514051
46.1	14897.3	0.000513837
46.2	14891.1	0.000513623
46.3	14884.9	0.000513409
46.4	14878.7	0.000513195
46.5	14872.5	0.000512982
46.6	14866.3	0.000512768
46.7	14860.1	0.000512555
46.8	14854	0.000512341
46.9	14847.8	0.000512128
47	14841.6	0.000511915
47.1	14835.4	0.000511701
47.2	14829.2	0.000511488
47.3	14823.1	0.000511275
47.4	14816.9	0.000511062
47.5	14810.7	0.00051085
47.6	14804.5	0.000510637
47.7	14798.4	0.000510424
47.8	14792.2	0.000510212
47.9	14786.1	0.000509999
48	14779.9	0.000509787
48.1	14773.7	0.000509575
48.2	14767.6	0.000509362
48.3	14761.4	0.00050915
48.4	14755.3	0.000508938
48.5	14749.2	0.000508726
48.6	14743	0.000508514
48.7	14736.9	0.000508303
48.8	14730.7	0.000508091
48.9	14724.6	0.000507879
49	14718.5	0.000507668
49.1	14712.3	0.000507456
49.2	14706.2	0.000507245
49.3	14700.1	0.000507034
49.4	14694	0.000506823
49.5	14687.8	0.000506612
49.6	14681.7	0.000506401
49.7	14675.6	0.00050619
49.8	14669.5	0.000505979
49.9	14663.4	0.000505768
50	14657.3	0.000505558
50.1	14135	0.000487544
50.2	14121.5	0.000487077
50.3	14108	0.00048661
50.4	14094.4	0.000486144
50.5	14080.9	0.000485678
50.6	14067.5	0.000485213
50.7	14054	0.000484748
50.8	14040.5	0.000484284
50.9	14027.1	0.00048382
51	14013.6	0.000483357
51.1	14000.2	0.000482894
51.2	13986.8	0.000482432
51.3	13973.4	0.00048197
51.4	13960	0.000481508
51.5	13946.7	0.000481047
51.6	13933.3	0.000480587
51.7	13920	0.000480127
51.8	13906.7	0.000479667
51.9	13893.3	0.000479208
52	13880	0.000478749
52.1	13866.8	0.000478291
52.2	13853.5	0.000477833
52.3	13840.2	0.000477375
52.4	13827	0.000476918
52.5	13813.7	0.000476462
52.6	13800.5	0.000476006
52.7	13787.3	0.00047555
52.8	13774.1	0.000475095
52.9	13760.9	0.000474641
53	13747.8	0.000474186
53.1	13734.6	0.000473733
53.2	13721.5	0.000473279
53.3	13708.3	0.000472827
53.4	13695.2	0.000472374
53.5	13682.1	0.000471922
53.6	13669	0.000471471
53.7	13656	0.00047102
53.8	13642.9	0.000470569
53.9	13629.8	0.000470119
54	13616.8	0.000469669
54.1	13603.8	0.00046922
54.2	13590.8	0.000468771
54.3	13577.8	0.000468323
54.4	13564.8	0.000467875
54.5	13551.8	0.000467427
54.6	13538.8	0.00046698
54.7	13525.9	0.000466534
54.8	13513	0.000466088
54.9	13500	0.000465642
55	13487.1	0.000465197
55.1	13474.2	0.000464752
55.2	13461.4	0.000464308
55.3	13448.5	0.000463864
55.4	13435.6	0.00046342
55.5	13422.8	0.000462977
55.6	13410	0.000462535
55.7	13397.1	0.000462093
55.8	13384.3	0.000461651
55.9	13371.5	0.00046121
56	13358.8	0.000460769
56.1	13346	0.000460328
56.2	13333.2	0.000459888
56.3	13320.5	0.000459449
56.4	13307.8	0.00045901
56.5	13295	0.000458571
56.6	13282.3	0.000458133
56.7	13269.6	0.000457695
56.8	13257	0.000457258
56.9	13244.3	0.000456821
57	13231.6	0.000456385
57.1	13219	0.000455949
57.2	13206.4	0.000455513
57.3	13193.8	0.000455078
57.4	13181.2	0.000454643
57.5	13168.6	0.000454209
57.6	13156	0.000453775
57.7	13143.4	0.000453341
57.8	13130.9	0.000452908
57.9	13118.3	0.000452476
58	13105.8	0.000452044
58.1	13093.3	0.000451612
58.2	13080.8	0.000451181
58.3	13068.3	0.00045075
58.4	13055.8	0.00045032
58.5	13043.3	0.00044989
58.6	13030.9	0.00044946
58.7	13018.4	0.000449031
58.8	13006	0.000448602
58.9	12993.6	0.000448174
59	12981.2	0.000447746
59.1	12968.8	0.000447319
59.2	12956.4	0.000446892
59.3	12944.1	0.000446465
59.4	12931.7	0.000446039
59.5	12919.4	0.000445613
59.6	12907	0.000445188
59.7	12894.7	0.000444763
59.8	12882.4	0.000444338
59.9	12870.1	0.000443914
60	12857.8	0.000443491
60.1	12845.6	0.000443068
60.2	12833.3	0.000442645
60.3	12821.1	0.000442222
60.4	12808.8	0.0004418
60.5	12796.6	0.000441379
60.6	12784.4	0.000440958
60.7	12772.2	0.000440537
60.8	12760	0.000440117
60.9	12747.8	0.000439697
61	12735.7	0.000439278
61.1	12723.5	0.000438859
61.2	12711.4	0.00043844
61.3	12699.3	0.000438022
61.4	12687.2	0.000437604
61.5	12675.1	0.000437187
61.6	12663	0.00043677
61.7	12650.9	0.000436353
61.8	12638.8	0.000435937
61.9	12626.8	0.000435521
62	12614.7	0.000435106
62.1	12602.7	0.000434691
62.2	12590.7	0.000434277
62.3	12578.7	0.000433863
62.4	12566.7	0.000433449
62.5	12554.7	0.000433036
62.6	12542.7	0.000432623
62.7	12530.8	0.000432211
62.8	12518.8	0.000431799
62.9	12506.9	0.000431387
63	12495	0.000430976
63.1	12483.1	0.000430565
63.2	12471.2	0.000430155
63.3	12459.3	0.000429745
63.4	12447.4	0.000429335
63.5	12435.6	0.000428926
63.6	12423.7	0.000428517
63.7	12411.9	0.000428109
63.8	12400	0.000427701
63.9	12388.2	0.000427294
64	12376.4	0.000426887
64.1	12364.6	0.00042648
64.2	12352.9	0.000426074
64.3	12341.1	0.000425668
64.4	12329.3	0.000425262
64.5	12317.6	0.000424857
64.6	12305.9	0.000424452
64.7	12294.1	0.000424048
64.8	12282.4	0.000423644
64.9	12270.7	0.000423241
65	12259	0.000422838
65.1	12247.4	0.000422435
65.2	12235.7	0.000422033
65.3	12224.1	0.000421631
65.4	12212.4	0.000421229
65.5	12200.8	0.000420828
65.6	12189.2	0.000420427
65.7	12177.6	0.000420027
65.8	12166	0.000419627
65.9	12154.4	0.000419228
66	12142.8	0.000418829
66.1	12131.3	0.00041843
66.2	12119.7	0.000418032
66.3	12108.2	0.000417634
66.4	12096.6	0.000417236
66.5	12085.1	0.000416839
66.6	12073.6	0.000416442
66.7	12062.1	0.000416046
66.8	12050.7	0.00041565
66.9	12039.2	0.000415255
67	12027.7	0.000414859
67.1	12016.3	0.000414465
67.2	12004.9	0.00041407
67.3	11993.4	0.000413676
67.4	11982	0.000413283
67.5	11970.6	0.000412889
67.6	11959.2	0.000412497
67.7	11947.9	0.000412104
67.8	11936.5	0.000411712
67.9	11925.1	0.00041132
68	11913.8	0.000410929
68.1	11902.5	0.000410538
68.2	11891.1	0.000410148
68.3	11879.8	0.000409758
68.4	11868.5	0.000409368
68.5	11857.2	0.000408979
68.6	11846	0.00040859
68.7	11834.7	0.000408201
68.8	11823.4	0.000407813
68.9	11812.2	0.000407425
69	11801	0.000407038
69.1	11789.8	0.000406651
69.2	11778.5	0.000406264
69.3	11767.3	0.000405878
69.4	11756.2	0.000405492
69.5	11745	0.000405107
69.6	11733.8	0.000404722
69.7	11722.7	0.000404337
69.8	11711.5	0.000403953
69.9	11700.4	0.000403569
70	11689.3	0.000403185
70.1	11678.2	0.000402802
70.2	11667.1	0.000402419
70.3	11656	0.000402037
70.4	11644.9	0.000401654
70.5	11633.8	0.000401273
70.6	11622.8	0.000400891
70.7	11611.7	0.000400511
70.8	11600.7	0.00040013
70.9	11589.7	0.00039975
71	11578.7	0.00039937
71.1	11567.7	0.000398991
71.2	11556.7	0.000398612
71.3	11545.7	0.000398233
71.4	11534.7	0.000397855
71.5	11523.8	0.000397477
71.6	11512.8	0.000397099
71.7	11501.9	0.000396722
71.8	11491	0.000396345
71.9	11480.1	0.000395969
72	11469.2	0.000395593
72.1	11458.3	0.000395217
72.2	11447.4	0.000394842
72.3	11436.5	0.000394467
72.4	11425.7	0.000394092
72.5	11414.8	0.000393718
72.6	11404	0.000393344
72.7	11393.1	0.000392971
72.8	11382.3	0.000392598
72.9	11371.5	0.000392225
73	11360.7	0.000391853
73.1	11349.9	0.000391481
73.2	11339.2	0.000391109
73.3	11328.4	0.000390738
73.4	11317.6	0.000390367
73.5	11306.9	0.000389997
73.6	11296.2	0.000389626
73.7	11285.5	0.000389257
73.8	11274.7	0.000388887
73.9	11264	0.000388518
74	11253.4	0.00038815
74.1	11242.7	0.000387781
74.2	11232	0.000387413
74.3	11221.4	0.000387046
74.4	11210.7	0.000386679
74.5	11200.1	0.000386312
74.6	11189.4	0.000385945
74.7	11178.8	0.000385579
74.8	11168.2	0.000385213
74.9	11157.6	0.000384848
75	11147.1	0.000384483
75.1	11136.5	0.000384118
75.2	11125.9	0.000383754
75.3	11115.4	0.00038339
75.4	11104.8	0.000383026
75.5	11094.3	0.000382663
75.6	11083.8	0.0003823
75.7	11073.3	0.000381938
75.8	11062.8	0.000381576
75.9	11052.3	0.000381214
76	11041.8	0.000380852
76.1	11031.3	0.000380491
76.2	11020.9	0.000380131
76.3	11010.4	0.00037977
76.4	11000	0.00037941
76.5	10989.6	0.000379051
76.6	10979.1	0.000378691
76.7	10968.7	0.000378332
76.8	10958.3	0.000377974
76.9	10947.9	0.000377616
77	10937.6	0.000377258
77.1	10927.2	0.0003769
77.2	10916.9	0.000376543
77.3	10906.5	0.000376186
77.4	10896.2	0.00037583
77.5	10885.8	0.000375474
77.6	10875.5	0.000375118
77.7	10865.2	0.000374762
77.8	10854.9	0.000374407
77.9	10844.7	0.000374053
78	10834.4	0.000373698
78.1	10824.1	0.000373344
78.2	10813.9	0.000372991
78.3	10803.6	0.000372637
78.4	10793.4	0.000372284
78.5	10783.2	0.000371932
78.6	10772.9	0.000371579
78.7	10762.7	0.000371228
78.8	10752.6	0.000370876
78.9	10742.4	0.000370525
79	10732.2	0.000370174
79.1	10722	0.000369823
79.2	10711.9	0.000369473
79.3	10701.7	0.000369123
79.4	10691.6	0.000368774
79.5	10681.5	0.000368425
79.6	10671.4	0.000368076
79.7	10661.3	0.000367727
79.8	10651.2	0.000367379
79.9	10641.1	0.000367032
80	10631	0.000366684
80.1	10621	0.000366337
80.2	10610.9	0.00036599
80.3	10600.9	0.000365644
80.4	10590.8	0.000365298
80.5	10580.8	0.000364952
80.6	10570.8	0.000364607
80.7	10560.8	0.000364262
80.8	10550.8	0.000363917
80.9	10540.8	0.000363573
81	10530.8	0.000363229
81.1	10520.9	0.000362885
81.2	10510.9	0.000362542
81.3	10501	0.000362199
81.4	10491.1	0.000361856
81.5	10481.1	0.000361514
81.6	10471.2	0.000361172
81.7	10461.3	0.00036083
81.8	10451.4	0.000360489
81.9	10441.5	0.000360148
82	10431.7	0.000359807
82.1	10421.8	0.000359467
82.2	10411.9	0.000359127
82.3	10402.1	0.000358788
82.4	10392.2	0.000358448
82.5	10382.4	0.000358109
82.6	10372.6	0.000357771
82.7	10362.8	0.000357433
82.8	10353	0.000357095
82.9	10343.2	0.000356757
83	10333.4	0.00035642
83.1	10323.7	0.000356083
83.2	10313.9	0.000355746
83.3	10304.2	0.00035541
83.4	10294.4	0.000355074
83.5	10284.7	0.000354738
83.6	10275	0.000354403
83.7	10265.3	0.000354068
83.8	10255.6	0.000353733
83.9	10245.9	0.000353399
84	10236.2	0.000353065
84.1	10226.5	0.000352732
84.2	10216.8	0.000352398
84.3	10207.2	0.000352065
84.4	10197.5	0.000351733
84.5	10187.9	0.0003514
84.6	10178.3	0.000351068
84.7	10168.7	0.000350737
84.8	10159.1	0.000350405
84.9	10149.5	0.000350074
85	10139.9	0.000349744
85.1	10130.3	0.000349413
85.2	10120.7	0.000349083
85.3	10111.2	0.000348754
85.4	10101.6	0.000348424
85.5	10092.1	0.000348095
85.6	10082.6	0.000347767
85.7	10073	0.000347438
85.8	10063.5	0.00034711
85.9	10054	0.000346782
86	10044.5	0.000346455
86.1	10035	0.000346128
86.2	10025.6	0.000345801
86.3	10016.1	0.000345475
86.4	10006.7	0.000345148
86.5	9997.21	0.000344823
86.6	9987.77	0.000344497
86.7	9978.34	0.000344172
86.8	9968.92	0.000343847
86.9	9959.51	0.000343522
87	9950.11	0.000343198
87.1	9940.72	0.000342874
87.2	9931.34	0.000342551
87.3	9921.97	0.000342228
87.4	9912.61	0.000341905
87.5	9903.25	0.000341582
87.6	9893.91	0.00034126
87.7	9884.57	0.000340938
87.8	9875.25	0.000340616
87.9	9865.93	0.000340295
88	9856.62	0.000339974
88.1	9847.33	0.000339653
88.2	9838.04	0.000339333
88.3	9828.76	0.000339012
88.4	9819.49	0.000338693
88.5	9810.22	0.000338373
88.6	9800.97	0.000338054
88.7	9791.73	0.000337735
88.8	9782.49	0.000337417
88.9	9773.27	0.000337099
89	9764.05	0.000336781
89.1	9754.84	0.000336463
89.2	9745.65	0.000336146
89.3	9736.46	0.000335829
89.4	9727.28	0.000335512
89.5	9718.11	0.000335196
89.6	9708.94	0.00033488
89.7	9699.79	0.000334564
89.8	9690.65	0.000334249
89.9	9681.51	0.000333934
90	9672.39	0.000333619
90.1	9663.27	0.000333305
90.2	9654.16	0.00033299
90.3	9645.06	0.000332677
90.4	9635.97	0.000332363
90.5	9626.89	0.00033205
90.6	9617.82	0.000331737
90.7	9608.76	0.000331424
90.8	9599.7	0.000331112
90.9	9590.66	0.0003308
91	9581.62	0.000330488
91.1	9572.59	0.000330177
91.2	9563.58	0.000329866
91.3	9554.57	0.000329555
91.4	9545.57	0.000329245
91.5	9536.57	0.000328934
91.6	9527.59	0.000328625
91.7	9518.62	0.000328315
91.8	9509.65	0.000328006
91.9	9500.69	0.000327697
92	9491.75	0.000327388
92.1	9482.81	0.00032708
92.2	9473.88	0.000326772
92.3	9464.96	0.000326464
92.4	9456.04	0.000326157
92.5	9447.14	0.00032585
92.6	9438.24	0.000325543
92.7	9429.36	0.000325236
92.8	9420.48	0.00032493
92.9	9411.61	0.000324624
93	9402.75	0.000324319
93.1	9393.9	0.000324013
93.2	9385.06	0.000323708
93.3	9376.22	0.000323404
93.4	9367.4	0.000323099
93.5	9358.58	0.000322795
93.6	9349.77	0.000322491
93.7	9340.97	0.000322188
93.8	9332.18	0.000321885
93.9	9323.4	0.000321582
94	9314.63	0.000321279
94.1	9305.86	0.000320977
94.2	9297.11	0.000320675
94.3	9288.36	0.000320373
94.4	9279.62	0.000320072
94.5	9270.89	0.000319771
94.6	9262.17	0.00031947
94.7	9253.45	0.000319169
94.8	9244.75	0.000318869
94.9	9236.05	0.000318569
95	9227.37	0.000318269
95.1	9218.69	0.00031797
95.2	9210.02	0.000317671
95.3	9201.36	0.000317372
95.4	9192.7	0.000317074
95.5	9184.06	0.000316776
95.6	9175.42	0.000316478
95.7	9166.79	0.00031618
95.8	9158.17	0.000315883
95.9	9149.56	0.000315586
96	9140.96	0.000315289
96.1	9132.37	0.000314993
96.2	9123.78	0.000314696
96.3	9115.2	0.000314401
96.4	9106.63	0.000314105
96.5	9098.07	0.00031381
96.6	9089.52	0.000313515
96.7	9080.98	0.00031322
96.8	9072.44	0.000312926
96.9	9063.92	0.000312632
97	9055.4	0.000312338
97.1	9046.89	0.000312044
97.2	9038.39	0.000311751
97.3	9029.89	0.000311458
97.4	9021.41	0.000311166
97.5	9012.93	0.000310873
97.6	9004.47	0.000310581
97.7	8996.01	0.000310289
97.8	8987.55	0.000309998
97.9	8979.11	0.000309707
98	8970.68	0.000309416
98.1	8962.25	0.000309125
98.2	8953.83	0.000308835
98.3	8945.42	0.000308545
98.4	8937.02	0.000308255
98.5	8928.63	0.000307965
98.6	8920.24	0.000307676
98.7	8911.86	0.000307387
98.8	8903.49	0.000307098
98.9	8895.13	0.00030681
99	8886.78	0.000306522
99.1	8878.44	0.000306234
99.2	8870.1	0.000305947
99.3	8861.77	0.000305659
99.4	8853.45	0.000305372
99.5	8845.14	0.000305086
99.6	8836.84	0.000304799
99.7	8828.54	0.000304513
99.8	8820.26	0.000304227
99.9	8811.98	0.000303942
100	8803.71	0.000303656
100.1	8795.44	0.000303371
100.2	8787.19	0.000303087
100.3	8778.94	0.000302802
100.4	8770.7	0.000302518
100.5	8762.47	0.000302234
100.6	8754.25	0.000301951
100.7	8746.04	0.000301667
100.8	8737.83	0.000301384
100.9	8729.63	0.000301102
101	8721.44	0.000300819
101.1	8713.26	0.000300537
101.2	8705.09	0.000300255
101.3	8696.92	0.000299973
101.4	8688.76	0.000299692
101.5	8680.61	0.000299411
101.6	8672.47	0.00029913
101.7	8664.34	0.000298849
101.8	8656.21	0.000298569
101.9	8648.09	0.000298289
102	8639.98	0.000298009
102.1	8631.88	0.00029773
102.2	8623.79	0.000297451
102.3	8615.7	0.000297172
102.4	8607.62	0.000296893
102.5	8599.55	0.000296615
102.6	8591.49	0.000296337
102.7	8583.44	0.000296059
102.8	8575.39	0.000295781
102.9	8567.35	0.000295504
103	8559.32	0.000295227
103.1	8551.3	0.00029495
103.2	8543.28	0.000294674
103.3	8535.27	0.000294398
103.4	8527.27	0.000294122
103.5	8519.28	0.000293846
103.6	8511.3	0.000293571
103.7	8503.32	0.000293296
103.8	8495.36	0.000293021
103.9	8487.4	0.000292746
104	8479.44	0.000292472
104.1	8471.5	0.000292198
104.2	8463.56	0.000291924
104.3	8455.63	0.000291651
104.4	8447.71	0.000291378
104.5	8439.8	0.000291105
104.6	8431.89	0.000290832
104.7	8423.99	0.00029056
104.8	8416.1	0.000290287
104.9	8408.22	0.000290015
105	8400.35	0.000289744
105.1	8392.48	0.000289473
105.2	8384.62	0.000289201
105.3	8376.77	0.000288931
105.4	8368.92	0.00028866
105.5	8361.09	0.00028839
105.6	8353.26	0.00028812
105.7	8345.44	0.00028785
105.8	8337.63	0.00028758
105.9	8329.82	0.000287311
106	8322.02	0.000287042
106.1	8314.23	0.000286774
106.2	8306.45	0.000286505
106.3	8298.67	0.000286237
106.4	8290.91	0.000285969
106.5	8283.15	0.000285701
106.6	8275.39	0.000285434
106.7	8267.65	0.000285167
106.8	8259.91	0.0002849
106.9	8252.18	0.000284633
107	8244.46	0.000284367
107.1	8236.75	0.000284101
107.2	8229.04	0.000283835
107.3	8221.34	0.00028357
107.4	8213.65	0.000283304
107.5	8205.96	0.000283039
107.6	8198.29	0.000282774
107.7	8190.62	0.00028251
107.8	8182.96	0.000282246
107.9	8175.3	0.000281982
108	8167.66	0.000281718
108.1	8160.02	0.000281454
108.2	8152.38	0.000281191
108.3	8144.76	0.000280928
108.4	8137.14	0.000280666
108.5	8129.53	0.000280403
108.6	8121.93	0.000280141
108.7	8114.34	0.000279879
108.8	8106.75	0.000279617
108.9	8099.17	0.000279356
109	8091.6	0.000279095
109.1	8084.03	0.000278834
109.2	8076.48	0.000278573
109.3	8068.93	0.000278313
109.4	8061.39	0.000278052
109.5	8053.85	0.000277793
109.6	8046.32	0.000277533
109.7	8038.8	0.000277274
109.8	8031.29	0.000277014
109.9	8023.78	0.000276755
110	8016.28	0.000276497
110.1	8008.79	0.000276238
110.2	8001.31	0.00027598
110.3	7993.83	0.000275722
110.4	7986.36	0.000275465
110.5	7978.9	0.000275207
110.6	7971.45	0.00027495
110.7	7964	0.000274693
110.8	7956.56	0.000274437
110.9	7949.13	0.000274181
111	7941.7	0.000273924
111.1	7934.29	0.000273669
111.2	7926.87	0.000273413
111.3	7919.47	0.000273158
111.4	7912.07	0.000272902
111.5	7904.69	0.000272648
111.6	7897.3	0.000272393
111.7	7889.93	0.000272139
111.8	7882.56	0.000271884
111.9	7875.2	0.000271631
112	7867.85	0.000271377
112.1	7860.5	0.000271124
112.2	7853.16	0.00027087
112.3	7845.83	0.000270618
112.4	7838.51	0.000270365
112.5	7831.19	0.000270113
112.6	7823.88	0.00026986
112.7	7816.58	0.000269609
112.8	7809.28	0.000269357
112.9	7801.99	0.000269106
113	7794.71	0.000268854
113.1	7787.44	0.000268603
113.2	7780.17	0.000268353
113.3	7772.91	0.000268102
113.4	7765.66	0.000267852
113.5	7758.41	0.000267602
113.6	7751.17	0.000267353
113.7	7743.94	0.000267103
113.8	7736.72	0.000266854
113.9	7729.5	0.000266605
114	7722.29	0.000266356
114.1	7715.08	0.000266108
114.2	7707.89	0.00026586
114.3	7700.7	0.000265612
114.4	7693.51	0.000265364
114.5	7686.34	0.000265116
114.6	7679.17	0.000264869
114.7	7672.01	0.000264622
114.8	7664.85	0.000264375
114.9	7657.71	0.000264129
115	7650.57	0.000263883
115.1	7643.43	0.000263636
115.2	7636.31	0.000263391
115.3	7629.19	0.000263145
115.4	7622.07	0.0002629
115.5	7614.97	0.000262655
115.6	7607.87	0.00026241
115.7	7600.78	0.000262165
115.8	7593.69	0.000261921
115.9	7586.61	0.000261677
116	7579.54	0.000261433
116.1	7572.48	0.000261189
116.2	7565.42	0.000260946
116.3	7558.37	0.000260703
116.4	7551.33	0.00026046
116.5	7544.29	0.000260217
116.6	7537.26	0.000259974
116.7	7530.24	0.000259732
116.8	7523.22	0.00025949
116.9	7516.21	0.000259248
117	7509.21	0.000259007
117.1	7502.22	0.000258766
117.2	7495.23	0.000258525
117.3	7488.25	0.000258284
117.4	7481.27	0.000258043
117.5	7474.3	0.000257803
117.6	7467.34	0.000257563
117.7	7460.39	0.000257323
117.8	7453.44	0.000257083
117.9	7446.5	0.000256844
118	7439.56	0.000256605
118.1	7432.63	0.000256366
118.2	7425.71	0.000256127
118.3	7418.8	0.000255888
118.4	7411.89	0.00025565
118.5	7404.99	0.000255412
118.6	7398.1	0.000255174
118.7	7391.21	0.000254937
118.8	7384.33	0.0002547
118.9	7377.46	0.000254462
119	7370.59	0.000254226
119.1	7363.73	0.000253989
119.2	7356.88	0.000253753
119.3	7350.03	0.000253516
119.4	7343.19	0.00025328
119.5	7336.36	0.000253045
119.6	7329.53	0.000252809
119.7	7322.71	0.000252574
119.8	7315.89	0.000252339
119.9	7309.09	0.000252104
120	7302.29	0.00025187
120.1	7295.49	0.000251635
120.2	7288.71	0.000251401
120.3	7281.93	0.000251167
120.4	7275.15	0.000250934
120.5	7268.38	0.0002507
120.6	7261.62	0.000250467
120.7	7254.87	0.000250234
120.8	7248.12	0.000250001
120.9	7241.38	0.000249769
121	7234.65	0.000249537
121.1	7227.92	0.000249305
121.2	7221.2	0.000249073
121.3	7214.48	0.000248841
121.4	7207.78	0.00024861
121.5	7201.07	0.000248379
121.6	7194.38	0.000248148
121.7	7187.69	0.000247917
121.8	7181.01	0.000247687
121.9	7174.33	0.000247456
122	7167.66	0.000247226
122.1	7161	0.000246997
122.2	7154.35	0.000246767
122.3	7147.7	0.000246538
122.4	7141.05	0.000246308
122.5	7134.42	0.00024608
122.6	7127.79	0.000245851
122.7	7121.16	0.000245622
122.8	7114.55	0.000245394
122.9	7107.93	0.000245166
123	7101.33	0.000244938
123.1	7094.73	0.000244711
123.2	7088.14	0.000244483
123.3	7081.56	0.000244256
123.4	7074.98	0.000244029
123.5	7068.41	0.000243803
123.6	7061.84	0.000243576
123.7	7055.28	0.00024335
123.8	7048.73	0.000243124
123.9	7042.18	0.000242898
124	7035.64	0.000242673
124.1	7029.11	0.000242447
124.2	7022.58	0.000242222
124.3	7016.06	0.000241997
124.4	7009.54	0.000241772
124.5	7003.03	0.000241548
124.6	6996.53	0.000241324
124.7	6990.04	0.0002411
124.8	6983.55	0.000240876
124.9	6977.06	0.000240652
125	6970.59	0.000240429
125.1	6964.12	0.000240206
125.2	6957.65	0.000239983
125.3	6951.19	0.00023976
125.4	6944.74	0.000239537
125.5	6938.3	0.000239315
125.6	6931.86	0.000239093
125.7	6925.42	0.000238871
125.8	6919	0.000238649
125.9	6912.58	0.000238428
126	6906.16	0.000238207
126.1	6899.76	0.000237986
126.2	6893.35	0.000237765
126.3	6886.96	0.000237544
126.4	6880.57	0.000237324
126.5	6874.19	0.000237104
126.6	6867.81	0.000236884
126.7	6861.44	0.000236664
126.8	6855.07	0.000236444
126.9	6848.72	0.000236225
127	6842.36	0.000236006
127.1	6836.02	0.000235787
127.2	6829.68	0.000235569
127.3	6823.34	0.00023535
127.4	6817.02	0.000235132
127.5	6810.7	0.000234914
127.6	6804.38	0.000234696
127.7	6798.07	0.000234478
127.8	6791.77	0.000234261
127.9	6785.47	0.000234044
128	6779.18	0.000233827
128.1	6772.9	0.00023361
128.2	6766.62	0.000233394
128.3	6760.35	0.000233177
128.4	6754.08	0.000232961
128.5	6747.82	0.000232745
128.6	6741.57	0.000232529
128.7	6735.32	0.000232314
128.8	6729.08	0.000232099
128.9	6722.84	0.000231884
129	6716.61	0.000231669
129.1	6710.39	0.000231454
129.2	6704.17	0.00023124
129.3	6697.96	0.000231025
129.4	6691.75	0.000230811
129.5	6685.55	0.000230597
129.6	6679.36	0.000230384
129.7	6673.17	0.00023017
129.8	6666.99	0.000229957
129.9	6660.82	0.000229744
130	6654.65	0.000229531
130.1	6648.48	0.000229319
130.2	6642.33	0.000229106
130.3	6636.18	0.000228894
130.4	6630.03	0.000228682
130.5	6623.89	0.000228471
130.6	6617.76	0.000228259
130.7	6611.63	0.000228048
130.8	6605.51	0.000227836
130.9	6599.39	0.000227626
131	6593.28	0.000227415
131.1	6587.18	0.000227204
131.2	6581.08	0.000226994
131.3	6574.99	0.000226784
131.4	6568.9	0.000226574
131.5	6562.82	0.000226364
131.6	6556.75	0.000226155
131.7	6550.68	0.000225945
131.8	6544.62	0.000225736
131.9	6538.56	0.000225527
132	6532.51	0.000225319
132.1	6526.47	0.00022511
132.2	6520.43	0.000224902
132.3	6514.39	0.000224694
132.4	6508.37	0.000224486
132.5	6502.35	0.000224278
132.6	6496.33	0.000224071
132.7	6490.32	0.000223863
132.8	6484.32	0.000223656
132.9	6478.32	0.00022345
133	6472.33	0.000223243
133.1	6466.34	0.000223036
133.2	6460.36	0.00022283
133.3	6454.39	0.000222624
133.4	6448.42	0.000222418
133.5	6442.45	0.000222212
133.6	6436.5	0.000222007
133.7	6430.54	0.000221802
133.8	6424.6	0.000221597
133.9	6418.66	0.000221392
134	6412.72	0.000221187
134.1	6406.8	0.000220983
134.2	6400.87	0.000220778
134.3	6394.96	0.000220574
134.4	6389.04	0.00022037
134.5	6383.14	0.000220167
134.6	6377.24	0.000219963
134.7	6371.35	0.00021976
134.8	6365.46	0.000219557
134.9	6359.57	0.000219354
135	6353.7	0.000219151
135.1	6347.83	0.000218949
135.2	6341.96	0.000218746
135.3	6336.1	0.000218544
135.4	6330.25	0.000218342
135.5	6324.4	0.00021814
135.6	6318.55	0.000217939
135.7	6312.72	0.000217738
135.8	6306.89	0.000217536
135.9	6301.06	0.000217336
136	6295.24	0.000217135
136.1	6289.43	0.000216934
136.2	6283.62	0.000216734
136.3	6277.81	0.000216534
136.4	6272.02	0.000216334
136.5	6266.22	0.000216134
136.6	6260.44	0.000215934
136.7	6254.66	0.000215735
136.8	6248.88	0.000215536
136.9	6243.11	0.000215337
137	6237.35	0.000215138
137.1	6231.59	0.000214939
137.2	6225.84	0.000214741
137.3	6220.09	0.000214543
137.4	6214.35	0.000214345
137.5	6208.61	0.000214147
137.6	6202.88	0.000213949
137.7	6197.15	0.000213752
137.8	6191.44	0.000213554
137.9	6185.72	0.000213357
138	6180.01	0.00021316
138.1	6174.31	0.000212964
138.2	6168.61	0.000212767
138.3	6162.92	0.000212571
138.4	6157.23	0.000212375
138.5	6151.55	0.000212179
138.6	6145.88	0.000211983
138.7	6140.21	0.000211787
138.8	6134.54	0.000211592
138.9	6128.89	0.000211397
139	6123.23	0.000211202
139.1	6117.58	0.000211007
139.2	6111.94	0.000210812
139.3	6106.3	0.000210618
139.4	6100.67	0.000210424
139.5	6095.05	0.00021023
139.6	6089.43	0.000210036
139.7	6083.81	0.000209842
139.8	6078.2	0.000209649
139.9	6072.6	0.000209455
140	6067	0.000209262
140.1	6061.4	0.000209069
140.2	6055.82	0.000208877
140.3	6050.23	0.000208684
140.4	6044.66	0.000208492
140.5	6039.08	0.000208299
140.6	6033.52	0.000208107
140.7	6027.96	0.000207916
140.8	6022.4	0.000207724
140.9	6016.85	0.000207533
141	6011.31	0.000207341
141.1	6005.77	0.00020715
141.2	6000.23	0.000206959
141.3	5994.7	0.000206769
141.4	5989.18	0.000206578
141.5	5983.66	0.000206388
141.6	5978.15	0.000206198
141.7	5972.64	0.000206008
141.8	5967.14	0.000205818
141.9	5961.64	0.000205628
142	5956.15	0.000205439
142.1	5950.66	0.00020525
142.2	5945.18	0.000205061
142.3	5939.71	0.000204872
142.4	5934.24	0.000204683
142.5	5928.77	0.000204495
142.6	5923.31	0.000204306
142.7	5917.86	0.000204118
142.8	5912.41	0.00020393
142.9	5906.97	0.000203742
143	5901.53	0.000203555
143.1	5896.09	0.000203367
143.2	5890.67	0.00020318
143.3	5885.24	0.000202993
143.4	5879.82	0.000202806
143.5	5874.41	0.00020262
143.6	5869	0.000202433
143.7	5863.6	0.000202247
143.8	5858.21	0.000202061
143.9	5852.81	0.000201875
144	5847.43	0.000201689
144.1	5842.05	0.000201503
144.2	5836.67	0.000201318
144.3	5831.3	0.000201133
144.4	5825.94	0.000200948
144.5	5820.57	0.000200763
144.6	5815.22	0.000200578
144.7	5809.87	0.000200393
144.8	5804.52	0.000200209
144.9	5799.19	0.000200025
145	5793.85	0.000199841
145.1	5788.52	0.000199657
145.2	5783.2	0.000199473
145.3	5777.88	0.00019929
145.4	5772.56	0.000199107
145.5	5767.26	0.000198924
145.6	5761.95	0.000198741
145.7	5756.65	0.000198558
145.8	5751.36	0.000198375
145.9	5746.07	0.000198193
146	5740.79	0.000198011
146.1	5735.51	0.000197829
146.2	5730.24	0.000197647
146.3	5724.97	0.000197465
146.4	5719.71	0.000197284
146.5	5714.45	0.000197102
146.6	5709.2	0.000196921
146.7	5703.95	0.00019674
146.8	5698.71	0.000196559
146.9	5693.47	0.000196379
147	5688.24	0.000196198
147.1	5683.01	0.000196018
147.2	5677.79	0.000195838
147.3	5672.57	0.000195658
147.4	5667.36	0.000195478
147.5	5662.15	0.000195298
147.6	5656.95	0.000195119
147.7	5651.75	0.00019494
147.8	5646.56	0.000194761
147.9	5641.37	0.000194582
148	5636.19	0.000194403
148.1	5631.01	0.000194224
148.2	5625.84	0.000194046
148.3	5620.67	0.000193868
148.4	5615.51	0.00019369
148.5	5610.35	0.000193512
148.6	5605.2	0.000193334
148.7	5600.06	0.000193157
148.8	5594.91	0.000192979
148.9	5589.78	0.000192802
149	5584.64	0.000192625
149.1	5579.52	0.000192448
149.2	5574.39	0.000192271
149.3	5569.28	0.000192095
149.4	5564.16	0.000191919
149.5	5559.06	0.000191742
149.6	5553.95	0.000191566
149.7	5548.86	0.000191391
149.8	5543.76	0.000191215
149.9	5538.68	0.000191039
150	5533.59	0.000190864
150.1	5528.51	0.000190689
150.2	5523.44	0.000190514
150.3	5518.37	0.000190339
150.4	5513.31	0.000190164
150.5	5508.25	0.00018999
150.6	5503.2	0.000189816
150.7	5498.15	0.000189642
150.8	5493.1	0.000189468
150.9	5488.07	0.000189294
151	5483.03	0.00018912
151.1	5478	0.000188947
151.2	5472.98	0.000188773
151.3	5467.96	0.0001886
151.4	5462.94	0.000188427
151.5	5457.93	0.000188254
151.6	5452.93	0.000188082
151.7	5447.93	0.000187909
151.8	5442.93	0.000187737
151.9	5437.94	0.000187565
152	5432.96	0.000187393
152.1	5427.97	0.000187221
152.2	5423	0.000187049
152.3	5418.03	0.000186878
152.4	5413.06	0.000186707
152.5	5408.1	0.000186536
152.6	5403.14	0.000186365
152.7	5398.19	0.000186194
152.8	5393.24	0.000186023
152.9	5388.3	0.000185853
153	5383.36	0.000185682
153.1	5378.43	0.000185512
153.2	5373.5	0.000185342
153.3	5368.57	0.000185172
153.4	5363.66	0.000185003
153.5	5358.74	0.000184833
153.6	5353.83	0.000184664
153.7	5348.93	0.000184495
153.8	5344.03	0.000184326
153.9	5339.13	0.000184157
154	5334.24	0.000183988
154.1	5329.35	0.00018382
154.2	5324.47	0.000183651
154.3	5319.6	0.000183483
154.4	5314.72	0.000183315
154.5	5309.86	0.000183147
154.6	5304.99	0.000182979
154.7	5300.14	0.000182812
154.8	5295.28	0.000182644
154.9	5290.44	0.000182477
155	5285.59	0.00018231
155.1	5280.75	0.000182143
155.2	5275.92	0.000181976
155.3	5271.09	0.00018181
155.4	5266.26	0.000181643
155.5	5261.44	0.000181477
155.6	5256.63	0.000181311
155.7	5251.82	0.000181145
155.8	5247.01	0.000180979
155.9	5242.21	0.000180814
156	5237.41	0.000180648
156.1	5232.62	0.000180483
156.2	5227.83	0.000180318
156.3	5223.04	0.000180153
156.4	5218.27	0.000179988
156.5	5213.49	0.000179823
156.6	5208.72	0.000179659
156.7	5203.96	0.000179494
156.8	5199.2	0.00017933
156.9	5194.44	0.000179166
157	5189.69	0.000179002
157.1	5184.94	0.000178838
157.2	5180.2	0.000178675
157.3	5175.46	0.000178511
157.4	5170.73	0.000178348
157.5	5166	0.000178185
157.6	5161.28	0.000178022
157.7	5156.56	0.000177859
157.8	5151.84	0.000177697
157.9	5147.13	0.000177534
158	5142.42	0.000177372
158.1	5137.72	0.00017721
158.2	5133.03	0.000177048
158.3	5128.33	0.000176886
158.4	5123.65	0.000176724
158.5	5118.96	0.000176563
158.6	5114.28	0.000176401
158.7	5109.61	0.00017624
158.8	5104.94	0.000176079
158.9	5100.27	0.000175918
159	5095.61	0.000175757
159.1	5090.96	0.000175597
159.2	5086.31	0.000175436
159.3	5081.66	0.000175276
159.4	5077.01	0.000175116
159.5	5072.38	0.000174956
159.6	5067.74	0.000174796
159.7	5063.11	0.000174636
159.8	5058.49	0.000174477
159.9	5053.87	0.000174317
160	5049.25	0.000174158
160.1	5044.64	0.000173999
160.2	5040.03	0.00017384
160.3	5035.43	0.000173681
160.4	5030.83	0.000173523
160.5	5026.24	0.000173364
160.6	5021.65	0.000173206
160.7	5017.06	0.000173048
160.8	5012.48	0.00017289
160.9	5007.9	0.000172732
161	5003.33	0.000172574
161.1	4998.76	0.000172417
161.2	4994.2	0.000172259
161.3	4989.64	0.000172102
161.4	4985.09	0.000171945
161.5	4980.54	0.000171788
161.6	4975.99	0.000171631
161.7	4971.45	0.000171475
161.8	4966.91	0.000171318
161.9	4962.38	0.000171162
162	4957.85	0.000171006
162.1	4953.33	0.00017085
162.2	4948.81	0.000170694
162.3	4944.29	0.000170538
162.4	4939.78	0.000170382
162.5	4935.27	0.000170227
162.6	4930.77	0.000170072
162.7	4926.27	0.000169916
162.8	4921.78	0.000169761
162.9	4917.29	0.000169607
163	4912.8	0.000169452
163.1	4908.32	0.000169297
163.2	4903.85	0.000169143
163.3	4899.37	0.000168989
163.4	4894.91	0.000168835
163.5	4890.44	0.000168681
163.6	4885.98	0.000168527
163.7	4881.53	0.000168373
163.8	4877.08	0.00016822
163.9	4872.63	0.000168066
164	4868.19	0.000167913
164.1	4863.75	0.00016776
164.2	4859.32	0.000167607
164.3	4854.89	0.000167454
164.4	4850.46	0.000167302
164.5	4846.04	0.000167149
164.6	4841.62	0.000166997
164.7	4837.21	0.000166845
164.8	4832.8	0.000166693
164.9	4828.4	0.000166541
165	4824	0.000166389
165.1	4819.6	0.000166237
165.2	4815.21	0.000166086
165.3	4810.83	0.000165934
165.4	4806.44	0.000165783
165.5	4802.06	0.000165632
165.6	4797.69	0.000165481
165.7	4793.32	0.000165331
165.8	4788.95	0.00016518
165.9	4784.59	0.00016503
166	4780.23	0.000164879
166.1	4775.88	0.000164729
166.2	4771.53	0.000164579
166.3	4767.18	0.000164429
166.4	4762.84	0.000164279
166.5	4758.51	0.00016413
166.6	4754.17	0.00016398
166.7	4749.84	0.000163831
166.8	4745.52	0.000163682
166.9	4741.2	0.000163533
167	4736.88	0.000163384
167.1	4732.57	0.000163235
167.2	4728.26	0.000163087
167.3	4723.96	0.000162938
167.4	4719.66	0.00016279
167.5	4715.36	0.000162642
167.6	4711.07	0.000162494
167.7	4706.78	0.000162346
167.8	4702.5	0.000162198
167.9	4698.22	0.000162051
168	4693.95	0.000161903
168.1	4689.68	0.000161756
168.2	4685.41	0.000161609
168.3	4681.15	0.000161462
168.4	4676.89	0.000161315
168.5	4672.63	0.000161168
168.6	4668.38	0.000161021
168.7	4664.13	0.000160875
168.8	4659.89	0.000160729
168.9	4655.65	0.000160582
169	4651.42	0.000160436
169.1	4647.19	0.00016029
169.2	4642.96	0.000160145
169.3	4638.74	0.000159999
169.4	4634.52	0.000159853
169.5	4630.31	0.000159708
169.6	4626.1	0.000159563
169.7	4621.89	0.000159418
169.8	4617.69	0.000159273
169.9	4613.49	0.000159128
170	4609.3	0.000158983
170.1	4605.11	0.000158839
170.2	4600.92	0.000158695
170.3	4596.74	0.00015855
170.4	4592.56	0.000158406
170.5	4588.39	0.000158262
170.6	4584.22	0.000158118
170.7	4580.05	0.000157975
170.8	4575.89	0.000157831
170.9	4571.73	0.000157688
171	4567.58	0.000157544
171.1	4563.43	0.000157401
171.2	4559.28	0.000157258
171.3	4555.14	0.000157115
171.4	4551	0.000156973
171.5	4546.87	0.00015683
171.6	4542.74	0.000156688
171.7	4538.61	0.000156545
171.8	4534.49	0.000156403
171.9	4530.37	0.000156261
172	4526.26	0.000156119
172.1	4522.15	0.000155977
172.2	4518.04	0.000155836
172.3	4513.94	0.000155694
172.4	4509.84	0.000155553
172.5	4505.74	0.000155412
172.6	4501.65	0.000155271
172.7	4497.56	0.00015513
172.8	4493.48	0.000154989
172.9	4489.4	0.000154848
173	4485.33	0.000154707
173.1	4481.26	0.000154567
173.2	4477.19	0.000154427
173.3	4473.12	0.000154287
173.4	4469.06	0.000154147
173.5	4465.01	0.000154007
173.6	4460.96	0.000153867
173.7	4456.91	0.000153727
173.8	4452.86	0.000153588
173.9	4448.82	0.000153448
174	4444.79	0.000153309
174.1	4440.76	0.00015317
174.2	4436.73	0.000153031
174.3	4432.7	0.000152892
174.4	4428.68	0.000152754
174.5	4424.66	0.000152615
174.6	4420.65	0.000152477
174.7	4416.64	0.000152338
174.8	4412.63	0.0001522
174.9	4408.63	0.000152062
175	4404.63	0.000151924
175.1	4400.64	0.000151786
175.2	4396.65	0.000151649
175.3	4392.66	0.000151511
175.4	4388.68	0.000151374
175.5	4384.7	0.000151237
175.6	4380.73	0.0001511
175.7	4376.75	0.000150963
175.8	4372.79	0.000150826
175.9	4368.82	0.000150689
176	4364.86	0.000150552
176.1	4360.91	0.000150416
176.2	4356.95	0.00015028
176.3	4353	0.000150143
176.4	4349.06	0.000150007
176.5	4345.12	0.000149871
176.6	4341.18	0.000149736
176.7	4337.25	0.0001496
176.8	4333.32	0.000149464
176.9	4329.39	0.000149329
177	4325.47	0.000149194
177.1	4321.55	0.000149058
177.2	4317.64	0.000148923
177.3	4313.72	0.000148789
177.4	4309.82	0.000148654
177.5	4305.91	0.000148519
177.6	4302.01	0.000148385
177.7	4298.12	0.00014825
177.8	4294.22	0.000148116
177.9	4290.33	0.000147982
178	4286.45	0.000147848
178.1	4282.57	0.000147714
178.2	4278.69	0.00014758
178.3	4274.82	0.000147447
178.4	4270.95	0.000147313
178.5	4267.08	0.00014718
178.6	4263.22	0.000147046
178.7	4259.36	0.000146913
178.8	4255.5	0.00014678
178.9	4251.65	0.000146647
179	4247.8	0.000146515
179.1	4243.96	0.000146382
179.2	4240.12	0.00014625
179.3	4236.28	0.000146117
179.4	4232.44	0.000145985
179.5	4228.61	0.000145853
179.6	4224.79	0.000145721
179.7	4220.97	0.000145589
179.8	4217.15	0.000145457
179.9	4213.33	0.000145326
180	4209.52	0.000145194
180.1	4205.71	0.000145063
180.2	4201.91	0.000144932
180.3	4198.11	0.000144801
180.4	4194.31	0.00014467
180.5	4190.51	0.000144539
180.6	4186.72	0.000144408
180.7	4182.94	0.000144277
180.8	4179.16	0.000144147
180.9	4175.38	0.000144017
181	4171.6	0.000143886
181.1	4167.83	0.000143756
181.2	4164.06	0.000143626
181.3	4160.3	0.000143496
181.4	4156.53	0.000143367
181.5	4152.78	0.000143237
181.6	4149.02	0.000143108
181.7	4145.27	0.000142978
181.8	4141.53	0.000142849
181.9	4137.78	0.00014272
182	4134.04	0.000142591
182.1	4130.31	0.000142462
182.2	4126.57	0.000142333
182.3	4122.84	0.000142205
182.4	4119.12	0.000142076
182.5	4115.4	0.000141948
182.6	4111.68	0.00014182
182.7	4107.96	0.000141691
182.8	4104.25	0.000141563
182.9	4100.54	0.000141436
183	4096.84	0.000141308
183.1	4093.14	0.00014118
183.2	4089.44	0.000141053
183.3	4085.75	0.000140925
183.4	4082.06	0.000140798
183.5	4078.37	0.000140671
183.6	4074.69	0.000140544
183.7	4071.01	0.000140417
183.8	4067.33	0.00014029
183.9	4063.66	0.000140163
184	4059.99	0.000140037
184.1	4056.32	0.00013991
184.2	4052.66	0.000139784
184.3	4049	0.000139658
184.4	4045.35	0.000139532
184.5	4041.7	0.000139406
184.6	4038.05	0.00013928
184.7	4034.4	0.000139154
184.8	4030.76	0.000139029
184.9	4027.12	0.000138903
185	4023.49	0.000138778
185.1	4019.86	0.000138653
185.2	4016.23	0.000138527
185.3	4012.61	0.000138402
185.4	4008.99	0.000138278
185.5	4005.37	0.000138153
185.6	4001.76	0.000138028
185.7	3998.15	0.000137904
185.8	3994.54	0.000137779
185.9	3990.94	0.000137655
186	3987.34	0.000137531
186.1	3983.74	0.000137407
186.2	3980.15	0.000137283
186.3	3976.56	0.000137159
186.4	3972.97	0.000137035
186.5	3969.39	0.000136912
186.6	3965.81	0.000136788
186.7	3962.23	0.000136665
186.8	3958.66	0.000136542
186.9	3955.09	0.000136419
187	3951.52	0.000136296
187.1	3947.96	0.000136173
187.2	3944.4	0.00013605
187.3	3940.85	0.000135927
187.4	3937.29	0.000135805
187.5	3933.74	0.000135682
187.6	3930.2	0.00013556
187.7	3926.66	0.000135438
187.8	3923.12	0.000135316
187.9	3919.58	0.000135194
188	3916.05	0.000135072
188.1	3912.52	0.00013495
188.2	3909	0.000134829
188.3	3905.47	0.000134707
188.4	3901.95	0.000134586
188.5	3898.44	0.000134465
188.6	3894.93	0.000134343
188.7	3891.42	0.000134222
188.8	3887.91	0.000134101
188.9	3884.41	0.000133981
189	3880.91	0.00013386
189.1	3877.42	0.000133739
189.2	3873.92	0.000133619
189.3	3870.44	0.000133499
189.4	3866.95	0.000133378
189.5	3863.47	0.000133258
189.6	3859.99	0.000133138
189.7	3856.51	0.000133018
189.8	3853.04	0.000132899
189.9	3849.57	0.000132779
190	3846.11	0.00013266
190.1	3842.64	0.00013254
190.2	3839.19	0.000132421
190.3	3835.73	0.000132302
190.4	3832.28	0.000132182
190.5	3828.83	0.000132064
190.6	3825.38	0.000131945
190.7	3821.94	0.000131826
190.8	3818.5	0.000131707
190.9	3815.06	0.000131589
191	3811.63	0.00013147
191.1	3808.2	0.000131352
191.2	3804.77	0.000131234
191.3	3801.35	0.000131116
191.4	3797.93	0.000130998
191.5	3794.51	0.00013088
191.6	3791.1	0.000130762
191.7	3787.69	0.000130645
191.8	3784.28	0.000130527
191.9	3780.88	0.00013041
192	3777.48	0.000130292
192.1	3774.08	0.000130175
192.2	3770.69	0.000130058
192.3	3767.3	0.000129941
192.4	3763.91	0.000129824
192.5	3760.53	0.000129708
192.6	3757.14	0.000129591
192.7	3753.77	0.000129475
192.8	3750.39	0.000129358
192.9	3747.02	0.000129242
193	3743.65	0.000129126
193.1	3740.29	0.00012901
193.2	3736.92	0.000128894
193.3	3733.57	0.000128778
193.4	3730.21	0.000128662
193.5	3726.86	0.000128546
193.6	3723.51	0.000128431
193.7	3720.16	0.000128315
193.8	3716.82	0.0001282
193.9	3713.48	0.000128085
194	3710.14	0.00012797
194.1	3706.81	0.000127855
194.2	3703.48	0.00012774
194.3	3700.15	0.000127625
194.4	3696.83	0.000127511
194.5	3693.51	0.000127396
194.6	3690.19	0.000127282
194.7	3686.88	0.000127167
194.8	3683.56	0.000127053
194.9	3680.26	0.000126939
195	3676.95	0.000126825
195.1	3673.65	0.000126711
195.2	3670.35	0.000126597
195.3	3667.05	0.000126484
195.4	3663.76	0.00012637
195.5	3660.47	0.000126257
195.6	3657.19	0.000126143
195.7	3653.9	0.00012603
195.8	3650.62	0.000125917
195.9	3647.35	0.000125804
196	3644.07	0.000125691
196.1	3640.8	0.000125578
196.2	3637.53	0.000125465
196.3	3634.27	0.000125353
196.4	3631.01	0.00012524
196.5	3627.75	0.000125128
196.6	3624.49	0.000125016
196.7	3621.24	0.000124903
196.8	3617.99	0.000124791
196.9	3614.75	0.000124679
197	3611.5	0.000124568
197.1	3608.26	0.000124456
197.2	3605.03	0.000124344
197.3	3601.79	0.000124233
197.4	3598.56	0.000124121
197.5	3595.33	0.00012401
197.6	3592.11	0.000123899
197.7	3588.89	0.000123788
197.8	3585.67	0.000123677
197.9	3582.45	0.000123566
198	3579.24	0.000123455
198.1	3576.03	0.000123344
198.2	3572.83	0.000123234
198.3	3569.62	0.000123123
198.4	3566.42	0.000123013
198.5	3563.22	0.000122902
198.6	3560.03	0.000122792
198.7	3556.84	0.000122682
198.8	3553.65	0.000122572
198.9	3550.47	0.000122462
199	3547.28	0.000122353
199.1	3544.1	0.000122243
[truncated: 1,509 more rows]

## Sheet: Vertical Wt.
Vertical weighting
distance from sensor r [m]
2
Penetration depth [cm]
87.8273
	depth [cm]	weight
	10	0.796348
	25	0.565922
	50	0.320268
	75	0.181247
	100	0.102572
	200	0.0105209
	300	0.00107915
