# Supplementary material for: Improving calibration and validation of cosmic-ray neutron sensors in the light of spatial sensitivity
Source: Copernicus journal article supplement (doi:10.5194/hess-21-5009-2017), 2017-10-06
Supplement: Supplementary file 2 [file hess-21-5009-2017-supplement.zip › CRNS-weighting.m]

% Radial weighting function for horizontal averaging
% in accordance to eq 4 from K\[ODoubleDot]hli et.al. 2015, WRR

% radial distance r [m] from the sensor
r0 = 0:0.1:1; % here WrX is defined
r1 = 1.1:0.1:50; % here WrA is defined
r2 = 50.1:0.1:350; % here WrB is defined


x =  0.1; % Air Humidity  from 0.1  to 50    in g/m^3
y =  0.01; % Soil Moisture from 0.02 to  0.50 in m^3/m^3
p = 900.0; % air pressure in mbar
Hveg = 0.0; % vegetation height in m
bd = 1.46;


  a00 = 8735; a01 = 22.689; a02 = 11720; a03 = 0.00978; a04 = 9306; a05 = 0.003632   ;
  a10 = 2.7925e-002; a11 = 6.6577; a12 = 0.028544; a13 = 0.002455; a14 = 6.851e-005; a15 = 12.2755;
  a20 = 247970; a21 = 23.289; a22 = 374655; a23 = 0.00191; a24 = 258552 ;
  a30 = 5.4818e-002; a31 = 21.032; a32 = 0.6373; a33 = 0.0791; a34 = 5.425e-004;
  
  A0 = (a00*(1+a03*x)*exp(-a01*y)+a02*(1+a05*x)-a04*y);
  A1 = ((-a10+a14*x)*exp(-a11*y/(1+a15*y))+a12)*(1+x*a13);
  A2 = (a20*(1+a23*x)*exp(-a21*y)+a22-a24*y);
  A3 = a30*exp(-a31*y)+a32-a33*y+a34*x;
  
  WrA = A0*(exp(-A1*r1))+A2*exp(-A3*r1);

  WrX = (A0*(exp(-A1*r1))+A2*exp(-A3*r1))*(1-exp(-3.7*r));


  b00 = 39006; b01 = 15002337; b02 = 2009.24; b03 = 0.01181; b04 = 3.146; b05 = 16.7417; b06 = 3727;
  b10 = 6.031e-005; b11 = 98.5; b12 = 0.0013826;
  b20 = 11747; b21 = 55.033; b22 = 4521; b23 = 0.01998; b24 = 0.00604; b25 = 3347.4; b26 = 0.00475 ;
  b30 = 1.543e-002; b31 = 13.29; b32 = 1.807e-002; b33 = 0.0011; b34 = 8.81e-005; b35 = 0.0405; b36 = 26.74 ;
  
  B0 = (b00-b01/(b02*y+x-0.13))*(b03-y)*exp(-b04*y)-b05*x*y+b06;
  B1 = b10*(x+b11)+b12*y;
  B2 = (b20*(1-b26*x)*exp(-b21*y*(1-x*b24))+b22-b25*y)*(2+x*b23);
  B3 = ((-b30+b34*x)*exp(-b31*y/(1+b35*x+b36*y))+b32)*(2+x*b33) ;
  
  WrB = B0*(exp(-B1*r2))+B2*exp(-B3*r2);

  D86 = 1/bd*(8.321+0.14249*(0.96655+exp(-0.01*r))*(20+y)/(0.0429+y));
  Wd = exp(-2*d/D86(r, bd, y);

  Fp = 0.4922/(0.86-exp(-p/1013.25));
  Fveg = 1-0.17*(1-exp(-0.41*Hveg))*(1+exp(-9.25*y));
  
  rscaled = r / Fp / Fveg;
  
  figure;
  plot(r0,WrX,r1,WrA,r2,WrB);
  xlim([0 350]);
  
  
